# Supplementary material
Source: PubMed Central journal article supplement (PMC9379241)
Supplement: 12519_2022_604_MOESM1_ESM.pdf [file 12519_2022_604_MOESM1_ESM.pdf]

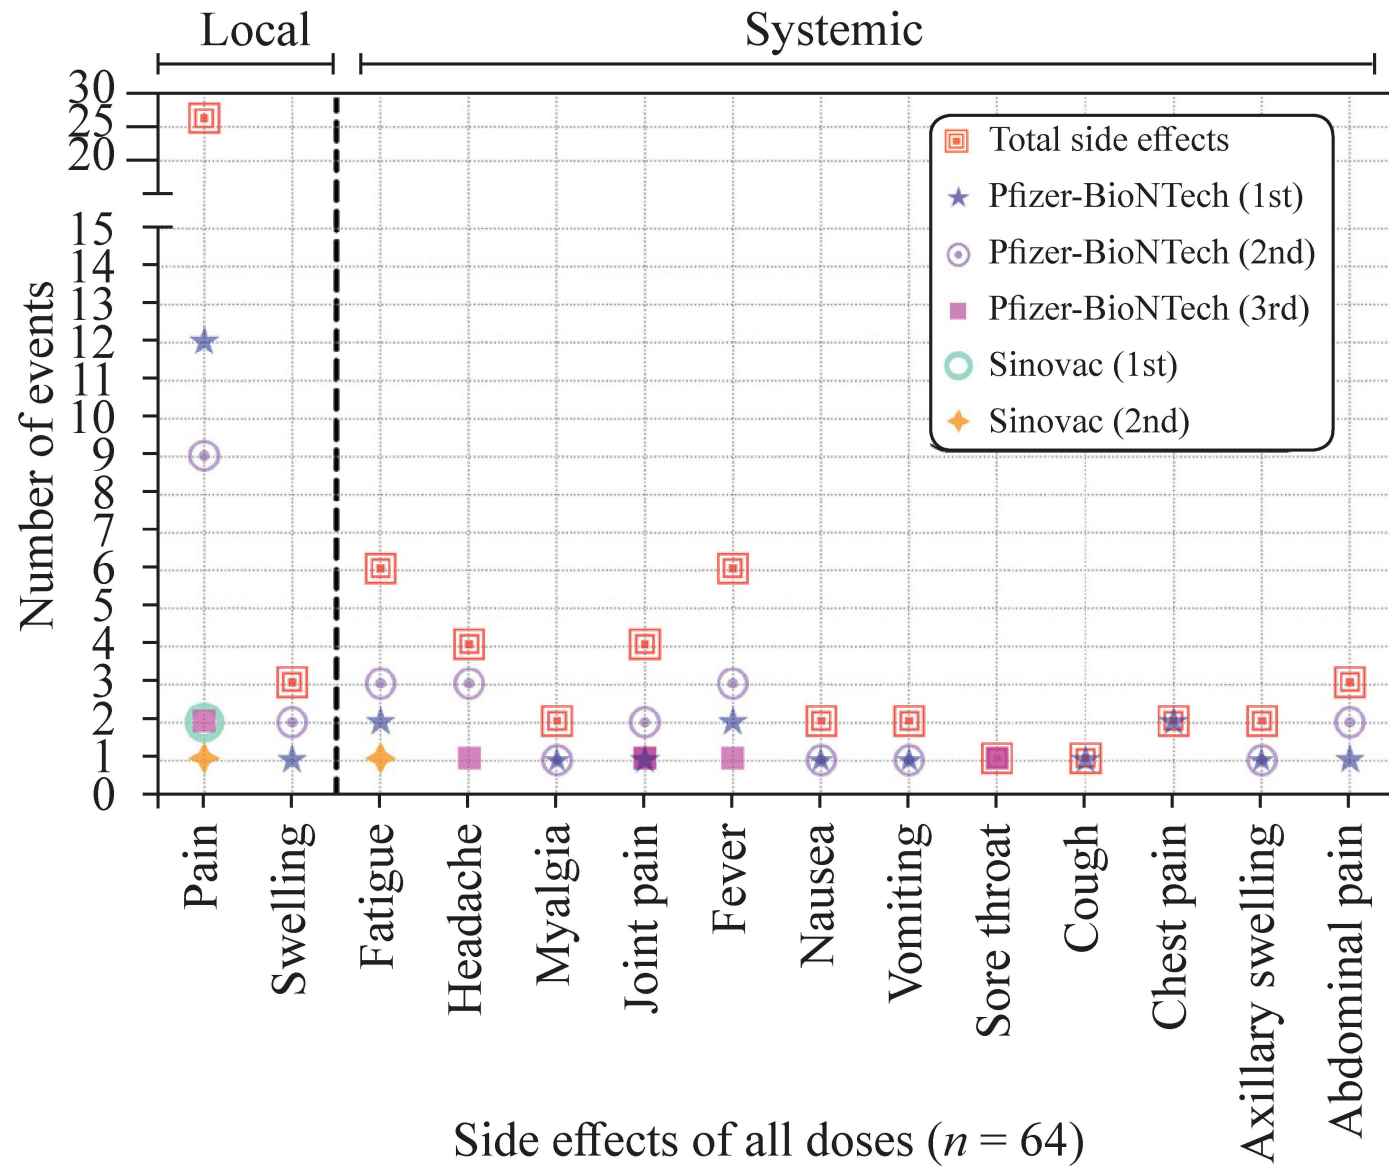

**Supplementary Figure 1.** Vaccine-associated side effects reported by children with a history of MIS-C.
